# Supplementary material for: Direct Comparison of the Effect of Processing Conditions in Electrolyte-Gated and Bottom-Gated TIPS-Pentacene Transistors
Source: MDPI journal article supplement (doi:10.3390/electronicmat3040024), 2022-09-27
Supplement: s1 [file s1]

## Supplementary information of

Article

# Direct Comparison of the Effect of Processing Conditions in Electrolyte-Gated and Bottom-Gated TIPS-Pentacene Transistors

Nicolò Lago <sup>1,\*</sup>, Marco Buonomo <sup>1</sup>, Federico Prescimone <sup>2</sup>, Stefano Toffanin <sup>2</sup>, Michele Muccini <sup>2</sup> and Andrea Cester <sup>1</sup>

<sup>1</sup> Department of Information Engineering, University of Padova, 35131 Padova, Italy

<sup>2</sup> Institute of Nanostructured Materials (ISMN), National Research Council (CNR), 40129 Bologna, Italy

\* Correspondence: lagonico@dei.unipd.it

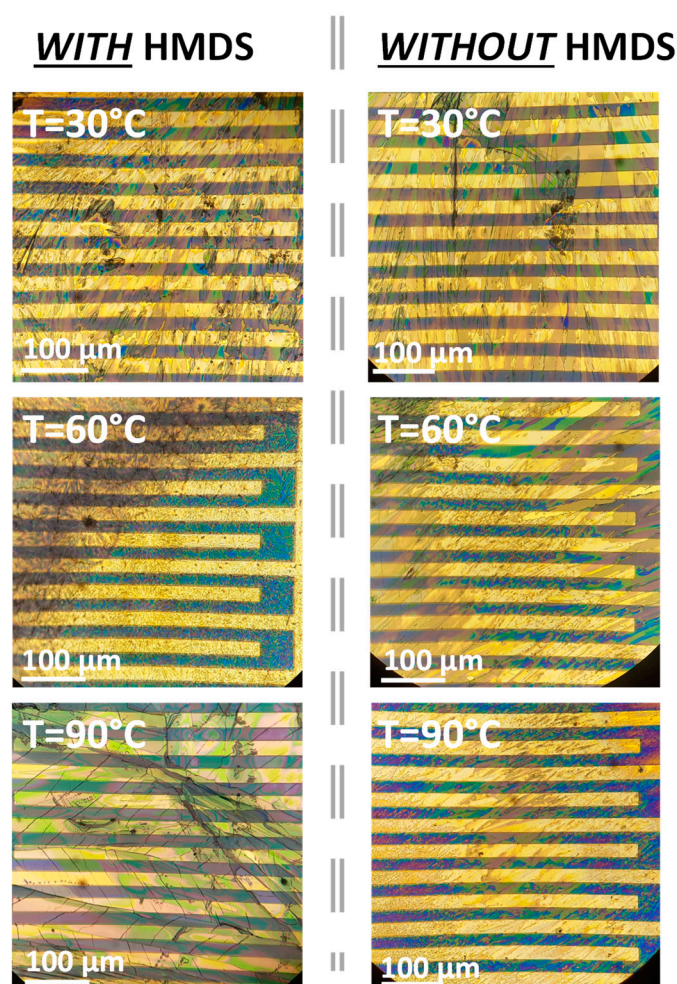

**Figure S1.** High-resolution optical image of TIPS-Pentacene deposited on top of the interdigitated source and drain electrodes for the three deposition temperature with and without HMDS functionalization (TIPS-P5 in 1% solution).

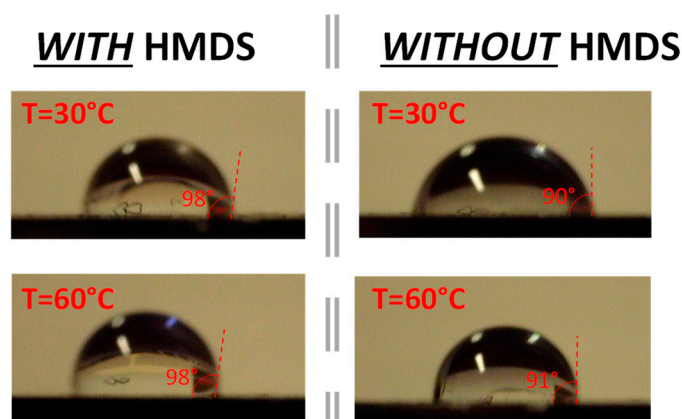

**Figure S2.** Contact angle measurement after TIPS-pentacene deposition with and without HMDS treatment (TIPS-P5 in 1% solution).

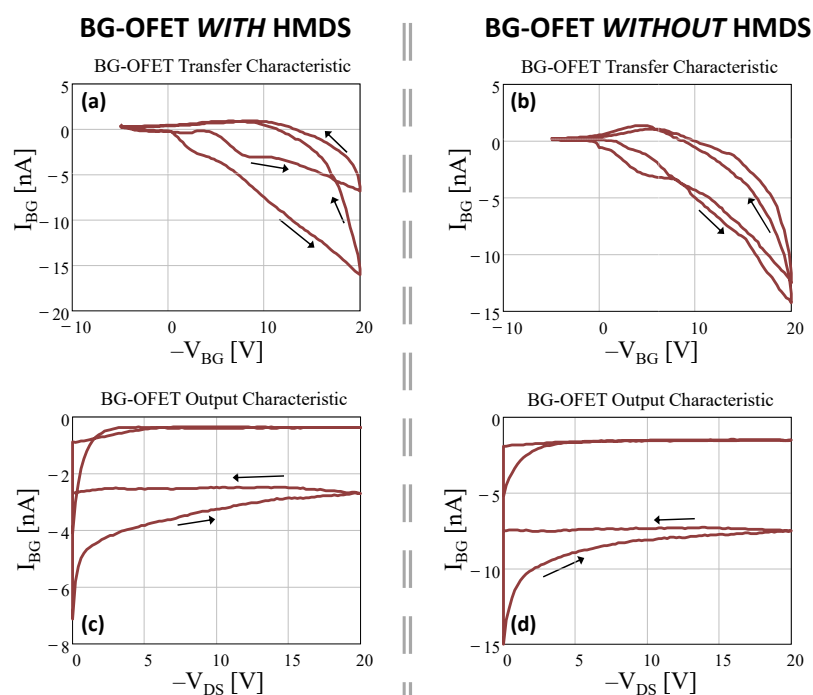

**Figure S3.** Bottom-Gate leakage currents of the transfer (upper panels) and output (lower panels) characteristics for BG-OFETs with (left panels) and without (right panels) HMDS functionalization (to be compared with Figure 3): (a) Transfer characteristics with HMDS; (b) transfer characteristics without HMDS; (c) output characteristics with HMDS; (d) output characteristics without HMDS.

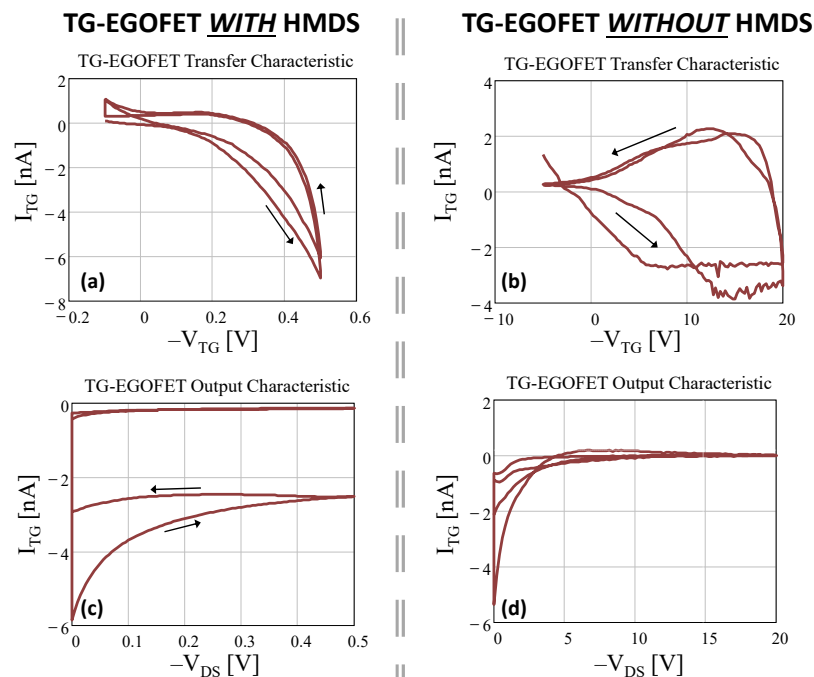

**Figure S4.** Top-Gate leakage currents of the transfer (upper panels) and output (lower panels) characteristics for TG-EGOFETs with (left panels) and without (right panels) HMDS functionalization (to be compared with Figure 4): (a) Transfer characteristics with HMDS; (b) transfer characteristics without HMDS; (c) output characteristics with HMDS; (d) output characteristics without HMDS.

**Table S1.** BG-OFETs parameters extrapolated using equation the trans-conductance method. The method was not applicable to all the devices, and it strongly underestimates devices threshold voltages that are not compatible whit the output characteristics (see Figure 3).

| TIPS-P5 Solution | Deposition Temperature (°C) | With HMDS Functionalization                            |                       | Without HMDS Functionalization                         |                       |
|------------------|-----------------------------|--------------------------------------------------------|-----------------------|--------------------------------------------------------|-----------------------|
|                  |                             | Mobility ( $\text{cm}^2 \text{V}^{-1} \text{s}^{-1}$ ) | Threshold Voltage (V) | Mobility ( $\text{cm}^2 \text{V}^{-1} \text{s}^{-1}$ ) | Threshold Voltage (V) |
| 1%               | 30                          | $3.01 \times 10^{-4}$                                  | 0.75                  | \                                                      | \                     |
|                  | 60                          | $1.13 \times 10^{-3}$                                  | 0.61                  | $2.84 \times 10^{-4}$                                  | 0.75                  |
|                  | 90                          | $2.38 \times 10^{-3}$                                  | -1.28                 | $2.61 \times 10^{-4}$                                  | -0.7                  |
| 5%               | 30                          | $4.17 \times 10^{-4}$                                  | -3.5                  | $1.49 \times 10^{-4}$                                  | 0.55                  |
|                  | 60                          | $8.94 \times 10^{-4}$                                  | 0.25                  | $2.64 \times 10^{-4}$                                  | 0.85                  |
|                  | 90                          | $2.98 \times 10^{-3}$                                  | -0.45                 | $5.07 \times 10^{-4}$                                  | 0.6                   |

**Table S2.** TG-OFETs parameters extrapolated using equation the trans-conductance method. The method was not applicable to all the devices, and it strongly overestimates devices threshold voltages that are not compatible whit the output characteristics (see Figure 4).

| TIPS-P5 Solution | Deposition Temperature (°C) | With HMDS Functionalization                            |                        | Without HMDS Functionalization                         |                        |
|------------------|-----------------------------|--------------------------------------------------------|------------------------|--------------------------------------------------------|------------------------|
|                  |                             | Mobility ( $\text{cm}^2 \text{V}^{-1} \text{s}^{-1}$ ) | Threshold Voltage (mV) | Mobility ( $\text{cm}^2 \text{V}^{-1} \text{s}^{-1}$ ) | Threshold Voltage (mV) |
| 1%               | 30                          | $5.16 \times 10^{-4}$                                  | -163.71                | $1.53 \times 10^{-3}$                                  | -124.73                |
|                  | 60                          | $1.09 \times 10^{-4}$                                  | -57.75                 | $9.45 \times 10^{-4}$                                  | -125.25                |
|                  | 90                          | $1.09 \times 10^{-4}$                                  | -127.2                 | $5.94 \times 10^{-4}$                                  | -177.82                |
| 5%               | 30                          | $1.99 \times 10^{-4}$                                  | -111.43                | $2.62 \times 10^{-4}$                                  | -86.4                  |
|                  | 60                          | $5.08 \times 10^{-5}$                                  | -60                    | $5.72 \times 10^{-4}$                                  | -90                    |
|                  | 90                          | $3.35 \times 10^{-5}$                                  | -9.43                  | $2.66 \times 10^{-4}$                                  | -86                    |
